# Supplementary material for: Improvement of the selectivity to aniline in benzene amination over Cu/TS-1 by potassium
Source: Royal Society of Chemistry journal article supplement (doi:10.1039/c7ra02074k), 2017-01-01
Supplement: c7ra02074k1.pdf [file c7ra02074k1.pdf]

## Improvement of the selectivity to aniline from benzene amination over Cu/TS-1 by potassium

Mi Nan, Yuecheng Luo, Guiying Li\* and Changwei Hu\*

Key Laboratory of Green Chemistry and Technology, Ministry of Education, College  
of Chemistry, Sichuan University, Chengdu 610064, China.

Fax: +86 28 85411105; Tel: +86 28 85411105

E-mail: changwei.hu@scu.edu.cn

Table S1 Example of parallel tests for activity measurement

|   | Yield(mol%) |        | Conversion of<br>benzene(%) | Selectivity of<br>aniline (%) |
|---|-------------|--------|-----------------------------|-------------------------------|
|   | Aniline     | Phenol |                             |                               |
| 0 | 2.12        | 0.01   | 2.13                        | 99.5                          |
| 1 | 2.15        | 0.01   | 2.16                        | 99.5                          |
| 2 | 2.12        | 0.02   | 2.14                        | 99.5                          |
| 3 | 2.08        | 0.01   | 2.09                        | 99.5                          |
| 4 | 2.13        | 0.02   | 2.15                        | 99.1                          |
| 5 | 2.12        | 0.01   | 2.13                        | 99.5                          |

Reaction conditions: 0.5 g Cu/TS-1, 40.0 mL H<sub>2</sub>O, 0.25 mL benzene, 1 g KNO<sub>3</sub>, 10 mL NH<sub>3</sub>·H<sub>2</sub>O and 2.5 mL H<sub>2</sub>O<sub>2</sub>, reaction temperature 60 °C, reaction time 4 h

Table S2 The effect of benzene loading on the amination reaction

| The amount<br>of benzene<br>(mL) | The amount<br>of aniline (umol) | Yield (mol%) |        | Conversion<br>of benzene<br>(%) | Selectivity to<br>aniline (%) |
|----------------------------------|---------------------------------|--------------|--------|---------------------------------|-------------------------------|
|                                  |                                 | Aniline      | Phenol |                                 |                               |
| 0.25                             | 59.36                           | 2.12         | 0.01   | 2.13                            | 99.5                          |
| 0.5                              | 117.04                          | 2.09         | 0.01   | 2.10                            | 99.5                          |
| 1.0                              | 239.68                          | 2.14         | 0.02   | 2.16                            | 99.1                          |
| 2.0                              | 472.64                          | 2.11         | 0.01   | 2.12                            | 99.5                          |

Reaction conditions: a: 0.5 g 1.0K-Cu/TS-1, 40 mL H<sub>2</sub>O, 10 mL NH<sub>3</sub>·H<sub>2</sub>O and 2.5 mL H<sub>2</sub>O<sub>2</sub>, reaction temperature 60 °C, reaction time 4 h.

Table S3 The effect of KNO<sub>3</sub> on the amination reaction over TS-1 catalyst

| KNO <sub>3</sub> additive amount (g) | Yield(mol%) |        | Conversion of benzene (%) | Selectivity of aniline (%) |
|--------------------------------------|-------------|--------|---------------------------|----------------------------|
|                                      | Aniline     | Phenol |                           |                            |
| 0                                    | 0.038       | 0.47   | 0.51                      | 7.5                        |
| 1                                    | 0.22        | 0      | 0.22                      | 100                        |

Reaction conditions: 0.5 g TS-1, 40.0 mL H<sub>2</sub>O, 0.25 mL benzene, 10 mL NH<sub>3</sub>·H<sub>2</sub>O and 2.5 mL H<sub>2</sub>O<sub>2</sub>, reaction temperature 60 °C, reaction time 4 h

Table S4 The XPS peak area ratio of Ti species for several typical catalysts

| Catalyst     | S <sub>Ti-O-Si</sub> : S <sub>Ti-O-Cu</sub> : S <sub>Ti-O-K</sub> |
|--------------|-------------------------------------------------------------------|
| Cu/TS-1      | 1 : 1.36 : 0                                                      |
| 1.0K-Cu/TS-1 | 1 : 1.29 : 0                                                      |
| Cu/TS-1-1.0K | 1 : 1.52 : 1.17                                                   |
| Catalyst 1   | 1 : 1.23 : 0                                                      |
| Catalyst 2   | 1 : 1.06 : 1.35                                                   |

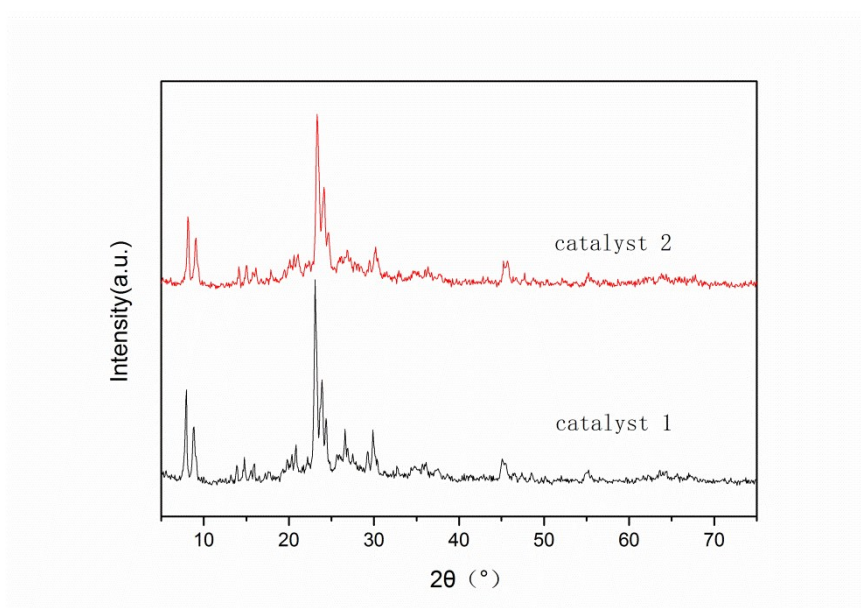

Fig. S1. XRD patterns of the catalysts 1 and 2

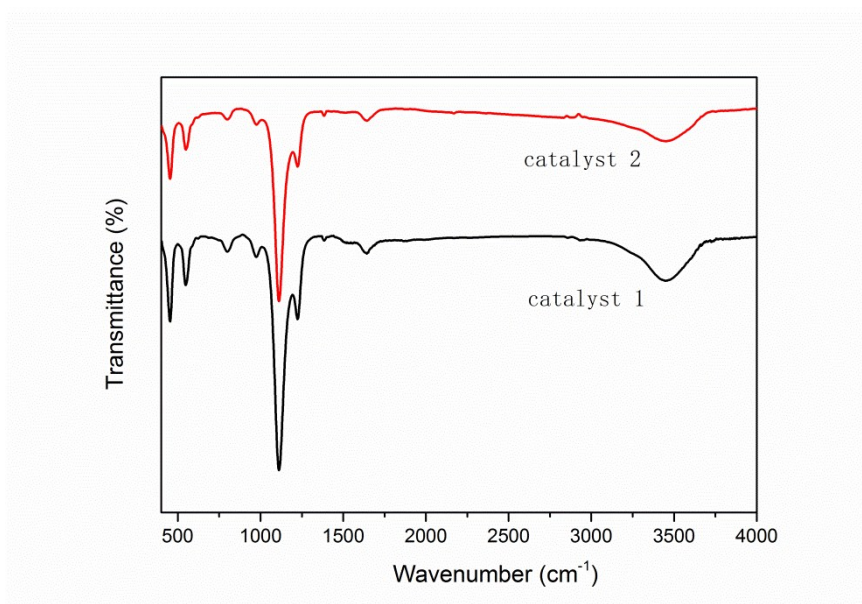

Fig.S2 FT-IR spectra of the catalysts 1 and 2

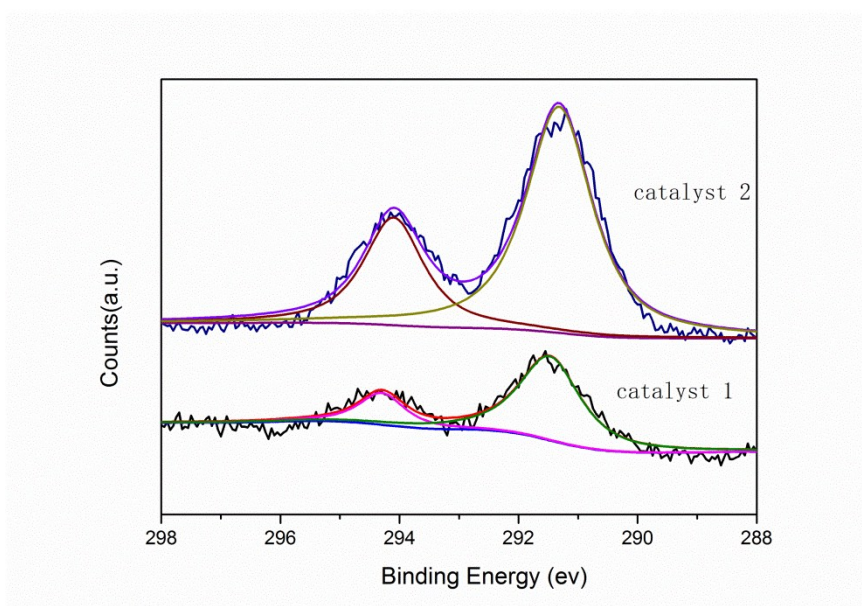

Fig.S3 K<sub>2p</sub> spectra of the catalysts 1 and 2

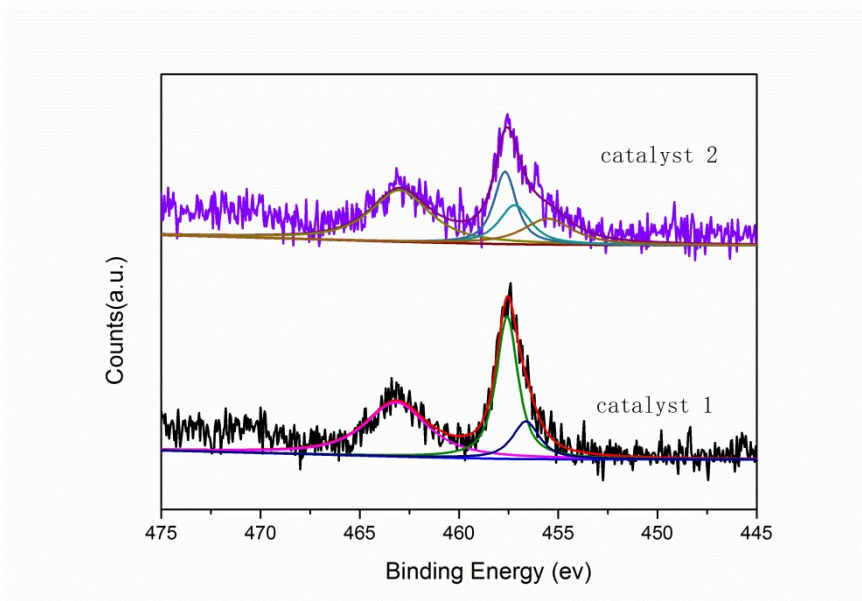

Fig.S4 Ti<sub>2p</sub> spectra of the catalysts 1 and 2

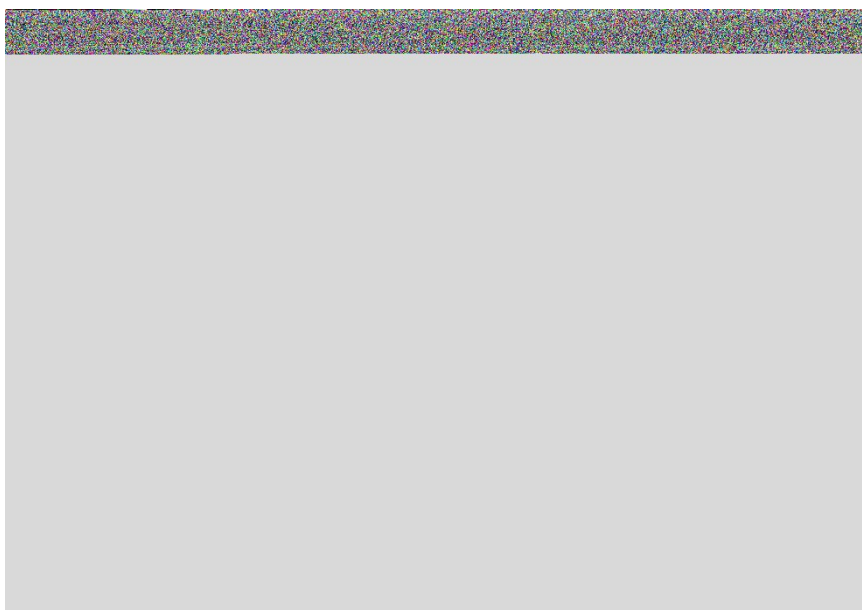

Fig. S5. UV-Vis spectra of the catalysts 1 and 2

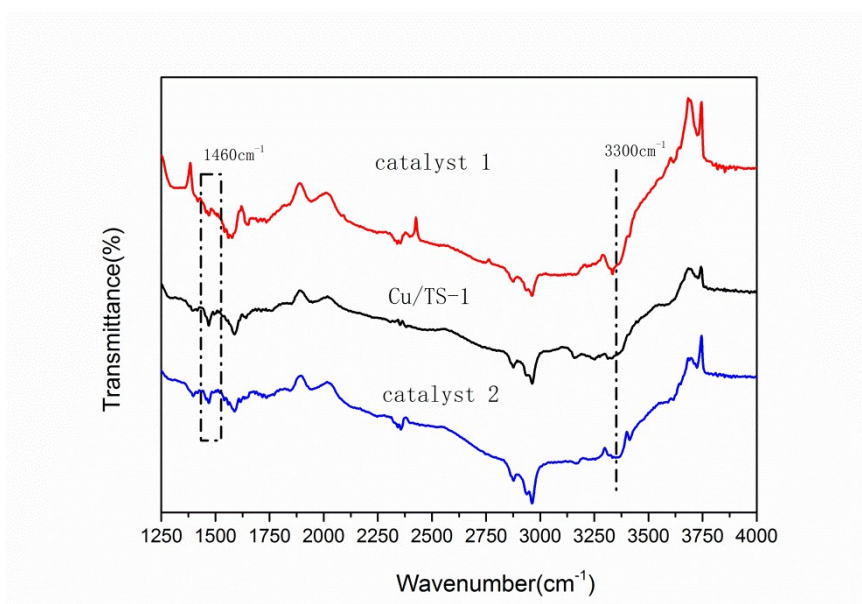

Fig. S6 NH<sub>3</sub>-IR analysis of Cu/TS-1, the catalysts 1 and 2
